# Supplementary material for: Real-world evidence on one-year clinical outcomes of nationwide implementation of diabetes self-management program and network system in type 1 diabetes in Thailand.
Source: Research Square preprint supplement (doi:10.21203/rs.3.rs-6985386/v1), 2025-07-14
Supplement: Supplementary file 1 [file b277c38936de0e208d10c113.docx]

**Supplemental materials**

**Thai-Type 1 Diabetes and Diabetes diagnosed Age before 30 years Registry, Care and Network (T1DDAR CN) investigators**:

Lukana Preechasuk, M.D.1, Ornsuda Lertbannaphong, M.D1, Raweewan Lertwattanarak, M.D. 1, Nattachet Plengvidhya., M.D1, Watip Tangjittipokin, PhD. 1, Thanyaros Sinsophonphap, M.D2,: Taninee Sahakitrungruang, M.D.3, Nitchakarn Laichuthai, M.D. 3, Chardpraorn Ngarmukos, M.D.4, Preamrudee Poomthavorn, M.D.4, Chaicharn Deerochanawong, M.D5, Chawkaew Kongkanka, M.D.6, Supawut Suksantilirs, M.D.7, Phatharaporn Kiatpanabhikul, M.D.7, Worraporn Tantichattanon, M.D.8, Karnsuda Pichetsin, M.D.9, Nawaporn Numbenjapon, M.D.10, Nattapol Sathavarodom, M.D.10, Chantraporn Keamseng, M.D.11, Ern-fah Na nagara, M.D.12, Porntipa Engkakul, M.D.13, Nattakarn Wongjitrat, M.D.14, Kinnaree Sorapipatcharoen, M.D.14, Sanguansak Siangruangsang, M.D.15, Orawan Rotjananirankit, M.D.15, Pimonsri Hantanasiriskul, M.D.16, Mattabhorn Phornphutkul, M.D.17, Meijinee Densriwiwat, M.D.18, Nithita Nanthatanti. M.D.19, Hataitip Tangngam, M.D.20, Sukanya wuttidechkamjorn, M.D.21, Pattara Wiromrat,M.D.22, Suranut Chareonsri, M.D.22, Chatchai Suesirisawad, M.D.23, Nattakarn Suwansaksri, M.D.23, Puntip Tantiwong, M.D.24, Sirilak Setthalak, M.D.24, , Nilobon Puntuwun, M.D.25, Somsongla Pirompuk, M.D.26, Jaturat Petchkul, M.D.27, Narisara Sunonta, M.D.28, Chutharat Nanthasuk, M.D.28, Krittha Jeerawongpanich, M.D.29, Somlak Tongmeesee, M.D30, Panuwat Suteerayongprasert, M.D.30, Thapana Roonghiranwat, M.D.31, Chotima Sornsiriwong, M.D.32, Naruewan Piriyabanjong, M.D.32, Rattana Leelawattana, M.D.33, Pathikan Dissaneevate, M.D.34, Lalita Lohawijarn, M.D.34, Saowanee Nakkaew, M.D.35, Palinee Nantarakchaikul, M.D.36, Sunita.Kitpakornsanti, M.D.37

1Siriraj Hospital, Mahidol University, Bangkok, 2Vajira Hospital, Navamindradhiraj University, Bangkok, 3King Chulalongkorn Memorial Hospital, Chulalongkorn University, Bangkok, 4Ramathibodi Hospital, Mahidol University, Bangkok, 5Rajavithi Hospital, Bangkok, 6Queen Sirikit National Institute of Child Health,  Bangkok, 7Charoen Krung PrachaRak Hospital, Bangkok, 8Taksin Hospital, Bangkok, 9Bhumibol Adulyadej hospital, Bangkok, 10Phramongkutklao Hospital, Bangkok, 11Somdejprapinklao Hospital, Bangkok, 12Veterans General Hospital, Bangkok, 13Thammasat University Hospital, Pathum Thani, 14HRH Princess Maha Chakri Sirindhorn Medical Center-MSMC Hospital, Nakhonnayok, 15Sawanpracharak Hospital, Nakhon Sawan, 16Nakhonpathom hospital, Nakhonpathom, 17Chiang Mai University Hospital, Chiang Mai, 18Buddhachinnaraj Hospital,  Phitsanulok, 19Chiang Rai Prachanukroh Hospital, Chiang Rai, 20Nakornping Hospital, Chiang Mai, 21Jainad Narendra Hospital, Jainad, 22Srinagarind Hospital, Khon Kaen University, Khon Kaen, 23Khon Kaen Hospital, Khon Khen , 24Maharat Nakhon Ratchasima Hospital, Nakhon Ratchasima, 25Mukdahan Hospital, Mukdahan, 26Sunphasitthiprasong Hospital, Ubon Ratchathani, 27Udon Thani Hospital, Udon Thani, 28Sakon Nakhon, 29Burapha University Hospital, Chonburi, 30Chonburi Hospital, Chonburi, 31Phrapokklao Hospital,  Chanthaburi, 32Rayong Hospital, Rayong, 33Songklanagarind Hospital, Prince of Songkla University, Songkhla, 34Hat Yai Hospital,  Songkhla, 35Maharaj Nakhon Si Thammarat Hospital, Nakhon Si Thammarat, 36Surat Thani Hospital, Surat Thani, 37Trang Hospital, Trang

**Thai-Type 1 Diabetes and Diabetes diagnosed Age before 30 years Registry, Care and Network (T1DDAR CN) committee**: Khemarasami Kunsuikmengrai, M.D, Somkiat Potisat, M.D, Panthep Kananurak, M.D., Ampha Suthijumroon, M.D., Ampica Mangklabruks, M.D., Sompongse Suwanwalaikorn, M.D., Sirimon Reutrakul, M.D., Wannee Nitiyanant, M.D., Chaicharn Deerochanawong, M.D., Petch Rawdaree, M.D., Supawadee Likitmaskul, M.D., Jeerunda Santiprabhob, M.D., Thipaporn Tharavanij, M.D., Prapai Dejkhamron, M.D., Rattana Leelawattana, M.D., Apiradee Sriwijitkamol, M.D., Chardpraorn Ngarmukos, M.D.,

Nawaporn Numbenjapon, M.D., Raweewan Lertwattanarak, M.D., Taninee Sahakitrungruang, M.D., Chawkaew Kongkanka, M.D., Porntipa Engkakul, M.D.

**Figure S1:** Consort diagram

Screened (n = 498)

- Not met inclusion criteria (n = 16)
- Incomplete baseline data (n = 1)

Included (n = 481)

- No data at 12 months (n = 54)
- Lost follow-up (n = 6)
- Referral (n = 5)
- Not received DSMP NS due to change in reimbursement entitlement (n = 2)
- Consent withdrawn (n = 1)
- Death (n = 1)

At 12 months (n = 412)
